# Supplementary material for: The importance of chain conformational mobility during 5-exo-cyclizations of C-, N- and O-centred radicals
Source: Royal Society of Chemistry journal article supplement (doi:10.1039/c4ob01419g), 2014-01-01
Supplement: c4ob01419g1.pdf [file c4ob01419g1.pdf]

## Electronic Supplementary Information

### The Importance of Chain Conformational Mobility During 5-*Exo*-Cyclizations of *C*-, *N*- and *O*-Centred Radicals

John C. Walton

University of St. Andrews, EaStCHEM School of Chemistry, St. Andrews, Fife, UK, KY16 9ST;

E-Mail: [jcw@st-and.ac.uk](mailto:jcw@st-and.ac.uk)

Tel.: 44 (0)1334 463864; Fax: 44 (0)1334 463808.

#### Table of Contents

|                                                                                        | <b>Page</b> |
|----------------------------------------------------------------------------------------|-------------|
| SOMOs of TSs and cyclised radicals computed at the G4 level                            | 2           |
| Penultimate Occupied MOs for Pentenyloxyl Cyclization TS computed at the G4 level      | 3           |
| Structures of reactive chair-like precursor conformations (um062x/6-311+(2d,p) level). | 4           |
| Cartesian coordinates of geometries GS radicals and TSs optimized with the G4 method   | 5           |
| Full Gaussina09 citation                                                               | 17          |

## SOMOs of TSs and cyclised radicals computed at the G4 level

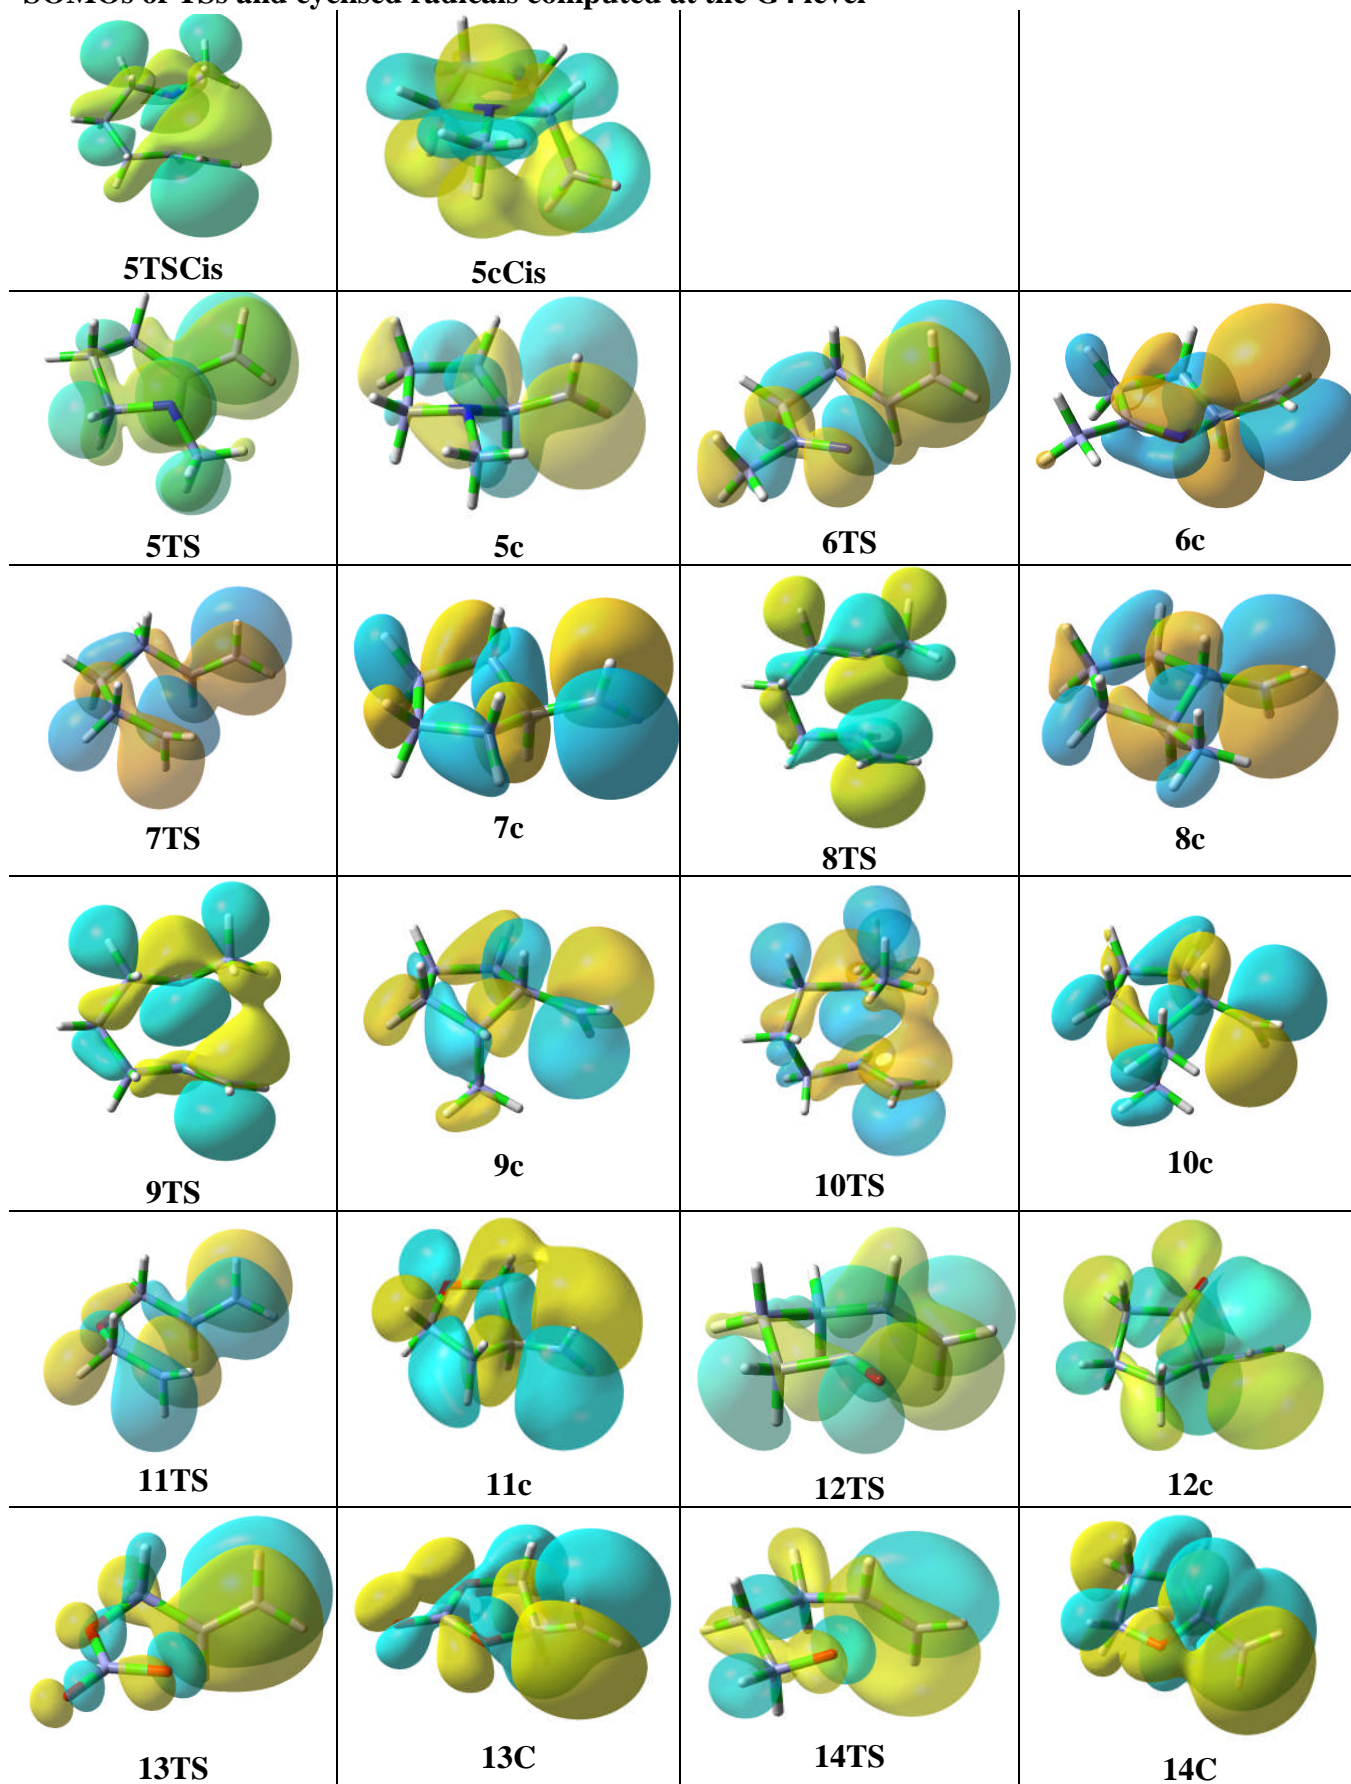

Penultimate Occupied MOs for Pentenyloxy Cyclization TS computed at the G4 level.

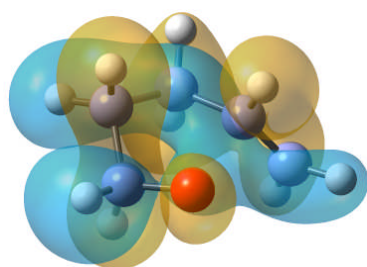

14TS POMO( $\alpha$ )

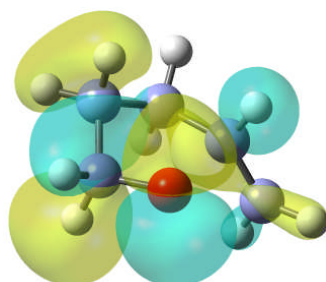

14TS POMO( $\beta$ )

Structures of reactive chair-like precursor conformations computed at the um062x/6-311+(2d,p) level.

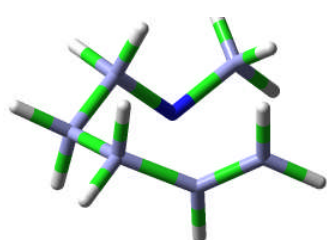**5PRcis**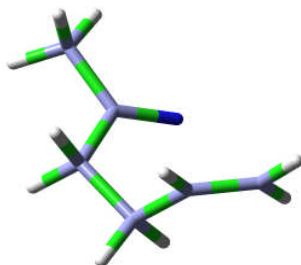**6PR**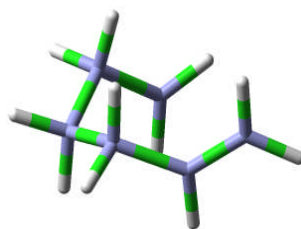**7PR**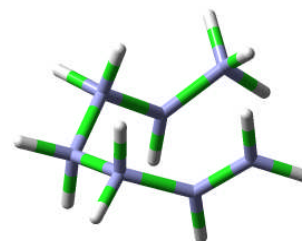**8PRcis**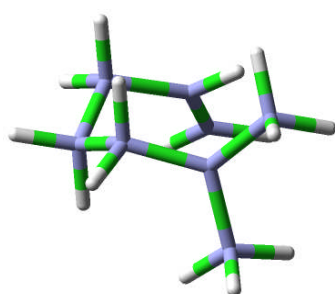**10PR**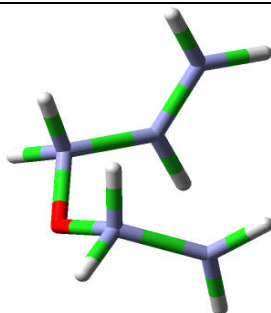**11PR**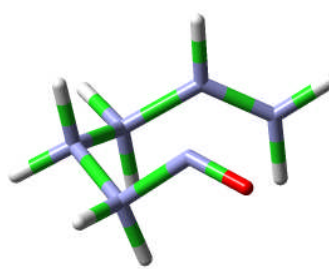**12PR**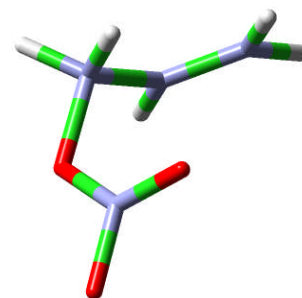**13PR**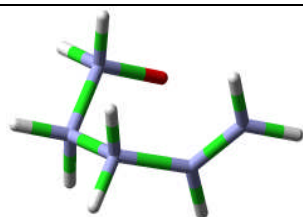**14PR**

## Cartesian coordinates of GS and TS geometries optimized with the G4 method

**5e**

E(UHF) = -288.70275897

| Center<br>Number | Atomic<br>Number | Atomic<br>Type | Coordinates (Angstroms) |           |           |
|------------------|------------------|----------------|-------------------------|-----------|-----------|
|                  |                  |                | X                       | Y         | Z         |
| 1                | 6                | 0              | 3.644597                | 0.036935  | -0.481069 |
| 2                | 1                | 0              | 3.605162                | 0.850941  | -1.200018 |
| 3                | 1                | 0              | 4.565899                | -0.535096 | -0.449450 |
| 4                | 6                | 0              | 2.619012                | -0.238707 | 0.318191  |
| 5                | 1                | 0              | 2.703208                | -1.067222 | 1.022009  |
| 6                | 6                | 0              | 1.306908                | 0.491817  | 0.337133  |
| 7                | 1                | 0              | 1.155149                | 0.939331  | 1.331165  |
| 8                | 1                | 0              | 1.338588                | 1.325028  | -0.376263 |
| 9                | 6                | 0              | 0.111222                | -0.422750 | 0.023556  |
| 10               | 1                | 0              | 0.090721                | -1.266601 | 0.723719  |
| 11               | 1                | 0              | 0.226688                | -0.855282 | -0.976453 |
| 12               | 6                | 0              | -1.229463               | 0.308193  | 0.099956  |
| 13               | 1                | 0              | -1.239579               | 1.162984  | -0.603316 |
| 14               | 1                | 0              | -1.357144               | 0.764525  | 1.100521  |
| 15               | 7                | 0              | -2.336496               | -0.569749 | -0.177985 |
| 16               | 6                | 0              | -3.601432               | 0.113909  | -0.128211 |
| 17               | 1                | 0              | -4.421798               | -0.582770 | -0.320458 |
| 18               | 1                | 0              | -3.767581               | 0.591431  | 0.852758  |
| 19               | 1                | 0              | -3.648902               | 0.924588  | -0.875654 |

**5TS(Cis) Chair**

E(UHF) = -288.66681284 AU

| Center<br>Number | Atomic<br>Number | Atomic<br>Type | Coordinates (Angstroms) |           |           |
|------------------|------------------|----------------|-------------------------|-----------|-----------|
|                  |                  |                | X                       | Y         | Z         |
| 1                | 6                | 0              | 1.659675                | -0.805254 | -0.069741 |
| 2                | 6                | 0              | 1.472342                | 0.703324  | 0.142066  |
| 3                | 6                | 0              | 0.144086                | 1.153375  | -0.440042 |
| 4                | 6                | 0              | 0.308600                | -1.423284 | 0.281988  |
| 5                | 1                | 0              | 1.888130                | -1.015041 | -1.120554 |
| 6                | 1                | 0              | 2.475653                | -1.207627 | 0.537992  |
| 7                | 1                | 0              | 2.289722                | 1.274394  | -0.313028 |
| 8                | 1                | 0              | 1.486235                | 0.929920  | 1.215143  |
| 9                | 1                | 0              | 0.109619                | 1.214787  | -1.523410 |
| 10               | 1                | 0              | 0.137208                | -1.384100 | 1.374135  |
| 11               | 1                | 0              | 0.260757                | -2.485433 | -0.006671 |
| 12               | 6                | 0              | -0.682683               | 2.008103  | 0.263866  |
| 13               | 1                | 0              | -1.514244               | 2.516172  | -0.211515 |
| 14               | 1                | 0              | -0.594637               | 2.113849  | 1.340825  |
| 15               | 7                | 0              | -0.675402               | -0.685616 | -0.479146 |
| 16               | 6                | 0              | -2.011624               | -0.761793 | 0.066954  |
| 17               | 1                | 0              | -2.659979               | -0.026199 | -0.418183 |
| 18               | 1                | 0              | -2.420182               | -1.761097 | -0.149264 |
| 19               | 1                | 0              | -2.072843               | -0.617138 | 1.158007  |

**5c Cis**

E(UHF) = -288.69789199 AU

| Center<br>Number | Atomic<br>Number | Atomic<br>Type | Coordinates (Angstroms) |           |           |
|------------------|------------------|----------------|-------------------------|-----------|-----------|
|                  |                  |                | X                       | Y         | Z         |
| 1                | 6                | 0              | 1.791565                | -0.584036 | 0.000099  |
| 2                | 6                | 0              | 1.372736                | 0.890089  | -0.172047 |

|    |   |   |           |           |           |
|----|---|---|-----------|-----------|-----------|
| 3  | 6 | 0 | -0.167840 | 0.864092  | -0.449025 |
| 4  | 6 | 0 | 0.493692  | -1.249047 | 0.460117  |
| 5  | 1 | 0 | 2.099934  | -1.013793 | -0.957571 |
| 6  | 1 | 0 | 2.614372  | -0.708431 | 0.708919  |
| 7  | 1 | 0 | 1.915667  | 1.396314  | -0.973498 |
| 8  | 1 | 0 | 1.565790  | 1.449804  | 0.748012  |
| 9  | 1 | 0 | -0.380953 | 1.192048  | -1.474260 |
| 10 | 1 | 0 | 0.338538  | -1.099100 | 1.548042  |
| 11 | 1 | 0 | 0.471606  | -2.330441 | 0.279998  |
| 12 | 6 | 0 | -0.922545 | 1.742134  | 0.495235  |
| 13 | 1 | 0 | -1.629731 | 2.485180  | 0.145959  |
| 14 | 1 | 0 | -0.832336 | 1.598653  | 1.567871  |
| 15 | 7 | 0 | -0.500284 | -0.583983 | -0.363102 |
| 16 | 6 | 0 | -1.881015 | -0.948314 | -0.132764 |
| 17 | 1 | 0 | -2.527672 | -0.422752 | -0.843416 |
| 18 | 1 | 0 | -2.003347 | -2.024406 | -0.302146 |
| 19 | 1 | 0 | -2.249441 | -0.724702 | 0.884114  |

**6e**

$$E(\text{UHF}) = -287.55083960 \text{ H}$$

| Center<br>Number | Atomic<br>Number | Atomic<br>Type | Coordinates (Angstroms) |           |           |
|------------------|------------------|----------------|-------------------------|-----------|-----------|
|                  |                  |                | X                       | Y         | Z         |
| 1                | 6                | 0              | -3.273462               | -0.139431 | -0.440901 |
| 2                | 1                | 0              | -3.235596               | 0.456004  | -1.349089 |
| 3                | 1                | 0              | -4.199622               | -0.670875 | -0.249151 |
| 4                | 6                | 0              | -2.240992               | -0.203342 | 0.393886  |
| 5                | 1                | 0              | -2.324535               | -0.812475 | 1.294625  |
| 6                | 6                | 0              | -0.927110               | 0.498511  | 0.203519  |
| 7                | 1                | 0              | -0.958378               | 1.124578  | -0.693824 |
| 8                | 1                | 0              | -0.736497               | 1.174623  | 1.046748  |
| 9                | 6                | 0              | 0.244097                | -0.490405 | 0.100533  |
| 10               | 1                | 0              | 0.103867                | -1.155494 | -0.761829 |
| 11               | 1                | 0              | 0.268187                | -1.149310 | 0.979781  |
| 12               | 7                | 0              | 1.775455                | 1.401553  | -0.014988 |
| 13               | 6                | 0              | 1.617797                | 0.159947  | -0.024422 |
| 14               | 6                | 0              | 2.807146                | -0.777959 | -0.161812 |
| 15               | 1                | 0              | 2.692184                | -1.400726 | -1.055430 |
| 16               | 1                | 0              | 3.737973                | -0.214382 | -0.235756 |
| 17               | 1                | 0              | 2.859371                | -1.446738 | 0.704029  |

**6c**

$$E(\text{UHF}) = -287.54673983$$

| Center<br>Number | Atomic<br>Number | Atomic<br>Type | Coordinates (Angstroms) |           |           |
|------------------|------------------|----------------|-------------------------|-----------|-----------|
|                  |                  |                | X                       | Y         | Z         |
| 1                | 6                | 0              | 0.675911                | 1.306888  | -0.013309 |
| 2                | 6                | 0              | -0.858505               | 1.260301  | -0.107662 |
| 3                | 6                | 0              | -1.190964               | -0.184227 | 0.384053  |
| 4                | 1                | 0              | 1.157658                | 1.836435  | -0.841887 |
| 5                | 1                | 0              | 1.026319                | 1.789132  | 0.909893  |
| 6                | 1                | 0              | -1.180156               | 1.373077  | -1.147411 |
| 7                | 1                | 0              | -1.357246               | 2.032845  | 0.481840  |
| 8                | 1                | 0              | -1.400861               | -0.145700 | 1.470802  |
| 9                | 6                | 0              | -2.337946               | -0.833618 | -0.303278 |
| 10               | 1                | 0              | -3.283830               | -0.312230 | -0.396463 |
| 11               | 1                | 0              | -2.278405               | -1.875583 | -0.590023 |
| 12               | 7                | 0              | 0.053316                | -0.964686 | 0.232638  |
| 13               | 6                | 0              | 1.028686                | -0.173118 | 0.022390  |
| 14               | 6                | 0              | 2.437852                | -0.652035 | -0.142086 |
| 15               | 1                | 0              | 2.839622                | -0.345069 | -1.115215 |
| 16               | 1                | 0              | 3.088796                | -0.206297 | 0.620022  |
| 17               | 1                | 0              | 2.484692                | -1.738960 | -0.060679 |

**6TS**

E(UHF) = -287.51622971

1 imaginary frequency

| Center<br>Number | Atomic<br>Number | Atomic<br>Type | Coordinates (Angstroms) |           |           |
|------------------|------------------|----------------|-------------------------|-----------|-----------|
|                  |                  |                | X                       | Y         | Z         |
| 1                | 6                | 0              | -0.632266               | 1.226568  | -0.102653 |
| 2                | 6                | 0              | 0.877372                | 1.196169  | 0.155321  |
| 3                | 6                | 0              | 1.454554                | -0.092370 | -0.387769 |
| 4                | 1                | 0              | -1.173029               | 1.877044  | 0.593698  |
| 5                | 1                | 0              | -0.862407               | 1.598183  | -1.111251 |
| 6                | 1                | 0              | 1.073840                | 1.245337  | 1.231981  |
| 7                | 1                | 0              | 1.369985                | 2.062494  | -0.301410 |
| 8                | 1                | 0              | 1.366617                | -0.228500 | -1.464242 |
| 9                | 6                | 0              | 2.501825                | -0.730765 | 0.240373  |
| 10               | 1                | 0              | 2.754332                | -0.509989 | 1.272792  |
| 11               | 1                | 0              | 3.028705                | -1.552209 | -0.230737 |
| 12               | 7                | 0              | -0.264359               | -1.158611 | -0.107963 |
| 13               | 6                | 0              | -1.098366               | -0.218145 | -0.013956 |
| 14               | 6                | 0              | -2.577804               | -0.499418 | 0.143923  |
| 15               | 1                | 0              | -2.946794               | -0.070826 | 1.082921  |
| 16               | 1                | 0              | -3.143024               | -0.030449 | -0.670042 |
| 17               | 1                | 0              | -2.769602               | -1.573043 | 0.140598  |

**7e**

E(UHF) = -233.64490022 H

| Center<br>Number | Atomic<br>Number | Atomic<br>Type | Coordinates (Angstroms) |           |           |
|------------------|------------------|----------------|-------------------------|-----------|-----------|
|                  |                  |                | X                       | Y         | Z         |
| 1                | 6                | 0              | 3.013749                | -0.162292 | 0.437287  |
| 2                | 1                | 0              | 3.018992                | 0.482889  | 1.311814  |
| 3                | 1                | 0              | 3.903608                | -0.760939 | 0.273297  |
| 4                | 6                | 0              | 1.972913                | -0.208832 | -0.388538 |
| 5                | 1                | 0              | 2.011881                | -0.872722 | -1.252691 |
| 6                | 6                | 0              | 0.701077                | 0.573640  | -0.232672 |
| 7                | 1                | 0              | 0.782833                | 1.246507  | 0.629819  |
| 8                | 1                | 0              | 0.553611                | 1.212778  | -1.115786 |
| 9                | 6                | 0              | -0.536381               | -0.328212 | -0.072148 |
| 10               | 1                | 0              | -0.419399               | -0.952389 | 0.821403  |
| 11               | 1                | 0              | -0.603351               | -1.017864 | -0.923010 |
| 12               | 6                | 0              | -1.853743               | 0.481509  | 0.031220  |
| 13               | 1                | 0              | -1.941152               | 1.104851  | -0.869379 |
| 14               | 1                | 0              | -1.766598               | 1.171709  | 0.880888  |
| 15               | 6                | 0              | -3.065545               | -0.370648 | 0.184842  |
| 16               | 1                | 0              | -3.540378               | -0.821589 | -0.679805 |
| 17               | 1                | 0              | -3.392464               | -0.704222 | 1.163508  |

**7TS**

E(UHF) = -233.62405637 H

1 imaginary frequency

| Center<br>Number | Atomic<br>Number | Atomic<br>Type | Coordinates (Angstroms) |           |           |
|------------------|------------------|----------------|-------------------------|-----------|-----------|
|                  |                  |                | X                       | Y         | Z         |
| 1                | 6                | 0              | -1.302927               | -0.875793 | 0.168183  |
| 2                | 6                | 0              | 0.166351                | -1.235040 | -0.081908 |
| 3                | 6                | 0              | 1.094760                | -0.145655 | 0.410899  |
| 4                | 6                | 0              | -0.487396               | 1.456537  | 0.187890  |
| 5                | 6                | 0              | -1.532520               | 0.543855  | -0.378880 |
| 6                | 1                | 0              | -1.980272               | -1.605264 | -0.289410 |
| 7                | 1                | 0              | -1.505089               | -0.885954 | 1.247659  |
| 8                | 1                | 0              | 0.333270                | -1.391321 | -1.155192 |
| 9                | 1                | 0              | 0.416405                | -2.181327 | 0.415227  |

|    |   |   |           |           |           |
|----|---|---|-----------|-----------|-----------|
| 10 | 1 | 0 | 1.071510  | 0.030004  | 1.484841  |
| 11 | 1 | 0 | -0.580426 | 1.741449  | 1.233358  |
| 12 | 1 | 0 | -0.036576 | 2.213304  | -0.444773 |
| 13 | 1 | 0 | -2.549591 | 0.885090  | -0.134002 |
| 14 | 1 | 0 | -1.463445 | 0.525004  | -1.473233 |
| 15 | 6 | 0 | 2.221607  | 0.228217  | -0.265805 |
| 16 | 1 | 0 | 2.963463  | 0.881913  | 0.179143  |
| 17 | 1 | 0 | 2.371503  | -0.045626 | -1.305886 |

**7c**

E(UHF) = -233.66316928 H

| Center<br>Number | Atomic<br>Number | Atomic<br>Type | Coordinates (Angstroms) |           |           |
|------------------|------------------|----------------|-------------------------|-----------|-----------|
|                  |                  |                | X                       | Y         | Z         |
| 1                | 6                | 0              | 1.467530                | -0.787380 | -0.053475 |
| 2                | 6                | 0              | 0.002462                | -1.193330 | 0.199541  |
| 3                | 6                | 0              | -0.826577               | -0.003654 | -0.361144 |
| 4                | 6                | 0              | 0.007579                | 1.206400  | 0.128569  |
| 5                | 6                | 0              | 1.485186                | 0.769724  | -0.012567 |
| 6                | 1                | 0              | 2.148397                | -1.232769 | 0.677341  |
| 7                | 1                | 0              | 1.789319                | -1.142875 | -1.037926 |
| 8                | 1                | 0              | -0.193802               | -1.282901 | 1.275260  |
| 9                | 1                | 0              | -0.268076               | -2.148169 | -0.259636 |
| 10               | 1                | 0              | -0.763925               | -0.046143 | -1.457382 |
| 11               | 1                | 0              | -0.224680               | 2.122584  | -0.421186 |
| 12               | 1                | 0              | -0.236615               | 1.395596  | 1.181355  |
| 13               | 1                | 0              | 1.922797                | 1.171941  | -0.931289 |
| 14               | 1                | 0              | 2.092808                | 1.151218  | 0.812882  |
| 15               | 6                | 0              | -2.252512               | 0.016835  | 0.050122  |
| 16               | 1                | 0              | -3.054001               | -0.228817 | -0.635782 |
| 17               | 1                | 0              | -2.514228               | 0.188764  | 1.090089  |

**8TS**

E(UHF) = -272.67698981

1 imaginary frequency

| Center<br>Number | Atomic<br>Number | Atomic<br>Type | Coordinates (Angstroms) |           |           |
|------------------|------------------|----------------|-------------------------|-----------|-----------|
|                  |                  |                | X                       | Y         | Z         |
| 1                | 6                | 0              | 0.872500                | -0.689231 | 0.449974  |
| 2                | 6                | 0              | -0.138863               | -1.539187 | -0.265160 |
| 3                | 6                | 0              | -1.546698               | -1.028644 | 0.072802  |
| 4                | 6                | 0              | -1.561620               | 0.478808  | -0.207578 |
| 5                | 1                | 0              | 0.023326                | -1.474725 | -1.349430 |
| 6                | 1                | 0              | -0.036835               | -2.602068 | 0.003138  |
| 7                | 1                | 0              | -2.321665               | -1.553498 | -0.496168 |
| 8                | 1                | 0              | -1.754460               | -1.209544 | 1.135956  |
| 9                | 1                | 0              | -1.540226               | 0.652560  | -1.291001 |
| 10               | 1                | 0              | -2.491198               | 0.929645  | 0.162911  |
| 11               | 1                | 0              | 0.878187                | -0.809104 | 1.533695  |
| 12               | 6                | 0              | 2.214930                | -0.431776 | -0.163183 |
| 13               | 1                | 0              | 2.767961                | 0.337878  | 0.384364  |
| 14               | 1                | 0              | 2.838156                | -1.340011 | -0.165791 |
| 15               | 1                | 0              | 2.122884                | -0.100288 | -1.203183 |
| 16               | 6                | 0              | -0.370167               | 1.167530  | 0.427176  |
| 17               | 1                | 0              | -0.359412               | 1.158455  | 1.515805  |
| 18               | 6                | 0              | 0.303616                | 2.185182  | -0.196659 |
| 19               | 1                | 0              | 0.205552                | 2.355300  | -1.264667 |
| 20               | 1                | 0              | 1.025550                | 2.799314  | 0.330134  |

**8e = 9e**

E(UHF) = -272.69854268



| Center<br>Number | Atomic<br>Number | Atomic<br>Type | Coordinates (Angstroms) |           |           |
|------------------|------------------|----------------|-------------------------|-----------|-----------|
|                  |                  |                | X                       | Y         | Z         |
| 1                | 6                | 0              | 3.603515                | 0.116741  | -0.410218 |
| 2                | 1                | 0              | 3.747865                | -0.914614 | -0.720965 |
| 3                | 1                | 0              | 4.416036                | 0.803522  | -0.623035 |
| 4                | 6                | 0              | 2.491510                | 0.511124  | 0.202559  |
| 5                | 1                | 0              | 2.390725                | 1.556959  | 0.494457  |
| 6                | 6                | 0              | 1.315694                | -0.365156 | 0.524589  |
| 7                | 1                | 0              | 1.538455                | -1.402402 | 0.245424  |
| 8                | 1                | 0              | 1.144419                | -0.363588 | 1.611241  |
| 9                | 6                | 0              | 0.021897                | 0.092733  | -0.173078 |
| 10               | 1                | 0              | 0.168249                | 0.071862  | -1.259623 |
| 11               | 1                | 0              | -0.186231               | 1.137756  | 0.089829  |
| 12               | 6                | 0              | -1.201037               | -0.782669 | 0.199863  |
| 13               | 1                | 0              | -1.329016               | -0.747483 | 1.291318  |
| 14               | 1                | 0              | -0.962255               | -1.825071 | -0.052959 |
| 15               | 6                | 0              | -2.468075               | -0.369865 | -0.473343 |
| 16               | 6                | 0              | -3.352354               | 0.694583  | 0.082944  |
| 17               | 1                | 0              | -2.980284               | 1.711314  | -0.135786 |
| 18               | 1                | 0              | -4.364697               | 0.641228  | -0.331359 |
| 19               | 1                | 0              | -3.427710               | 0.625267  | 1.175603  |
| 20               | 1                | 0              | -2.622463               | -0.679697 | -1.504046 |

**8TS**

E(UHF) = -272.67424864 AU

## 1 Imaginary frequency

| Center<br>Number | Atomic<br>Number | Atomic<br>Type | Coordinates (Angstroms) |           |           |
|------------------|------------------|----------------|-------------------------|-----------|-----------|
|                  |                  |                | X                       | Y         | Z         |
| 1                | 6                | 0              | 0.776274                | -1.365163 | -0.104308 |
| 2                | 6                | 0              | 1.092301                | 0.065890  | -0.427298 |
| 3                | 6                | 0              | -0.829630               | 0.850608  | 0.412709  |
| 4                | 6                | 0              | -1.473129               | -0.525120 | 0.542913  |
| 5                | 6                | 0              | -0.729655               | -1.586084 | -0.288912 |
| 6                | 1                | 0              | 1.346319                | -2.060288 | -0.740969 |
| 7                | 1                | 0              | 1.062694                | -1.588727 | 0.932466  |
| 8                | 1                | 0              | -0.246357               | 1.186325  | 1.267013  |
| 9                | 1                | 0              | -1.465041               | -0.824806 | 1.597901  |
| 10               | 1                | 0              | -2.524361               | -0.475859 | 0.240595  |
| 11               | 1                | 0              | -1.034799               | -2.600901 | -0.010501 |
| 12               | 1                | 0              | -0.981965               | -1.455782 | -1.349217 |
| 13               | 6                | 0              | -1.340752               | 1.816264  | -0.412371 |
| 14               | 1                | 0              | -0.969042               | 2.834984  | -0.396961 |
| 15               | 1                | 0              | -2.074961               | 1.576989  | -1.176290 |
| 16               | 6                | 0              | 2.227491                | 0.773858  | 0.247841  |
| 17               | 1                | 0              | 3.204930                | 0.421946  | -0.120120 |
| 18               | 1                | 0              | 2.192715                | 1.853933  | 0.068704  |
| 19               | 1                | 0              | 2.221633                | 0.608034  | 1.331882  |
| 20               | 1                | 0              | 0.930835                | 0.342629  | -1.467961 |

**8c**

E(UHF) = -272.71475258 AU

| Center<br>Number | Atomic<br>Number | Atomic<br>Type | Coordinates (Angstroms) |           |           |
|------------------|------------------|----------------|-------------------------|-----------|-----------|
|                  |                  |                | X                       | Y         | Z         |
| 1                | 6                | 0              | -0.780934               | -1.357349 | 0.024674  |
| 2                | 6                | 0              | 0.504017                | -0.592530 | -0.338102 |
| 3                | 6                | 0              | 0.276306                | 0.797117  | 0.333967  |
| 4                | 6                | 0              | -1.212949               | 1.079131  | 0.008679  |
| 5                | 6                | 0              | -1.918675               | -0.304596 | -0.009166 |
| 6                | 1                | 0              | -0.964746               | -2.204339 | -0.643458 |
| 7                | 1                | 0              | -0.675221               | -1.770520 | 1.035684  |
| 8                | 1                | 0              | 0.377573                | 0.643025  | 1.418113  |
| 9                | 1                | 0              | -1.659626               | 1.778823  | 0.720157  |
| 10               | 1                | 0              | -1.276006               | 1.552841  | -0.977942 |
| 11               | 1                | 0              | -2.592557               | -0.424897 | 0.843825  |

|    |   |   |           |           |           |
|----|---|---|-----------|-----------|-----------|
| 12 | 1 | 0 | -2.533886 | -0.412790 | -0.907200 |
| 13 | 6 | 0 | 1.209212  | 1.867813  | -0.096618 |
| 14 | 1 | 0 | 2.015795  | 2.220676  | 0.534330  |
| 15 | 1 | 0 | 1.147667  | 2.267629  | -1.104646 |
| 16 | 6 | 0 | 1.797491  | -1.290832 | 0.070972  |
| 17 | 1 | 0 | 1.897724  | -2.264388 | -0.420890 |
| 18 | 1 | 0 | 2.673684  | -0.689988 | -0.193126 |
| 19 | 1 | 0 | 1.822948  | -1.463024 | 1.153969  |
| 20 | 1 | 0 | 0.519841  | -0.425566 | -1.425252 |

**9c**

E(UHF) = -272.71125202 H

| Center<br>Number | Atomic<br>Number | Atomic<br>Type | Coordinates (Angstroms) |           |           |
|------------------|------------------|----------------|-------------------------|-----------|-----------|
|                  |                  |                | X                       | Y         | Z         |
| 1                | 6                | 0              | -1.451752               | 0.442366  | -0.609251 |
| 2                | 6                | 0              | 0.030134                | 0.854438  | -0.523781 |
| 3                | 6                | 0              | 0.741835                | -0.543927 | -0.464675 |
| 4                | 6                | 0              | -0.162655               | -1.362040 | 0.491972  |
| 5                | 6                | 0              | -1.595288               | -0.782838 | 0.331180  |
| 6                | 1                | 0              | -2.130531               | 1.259346  | -0.344909 |
| 7                | 1                | 0              | -1.689134               | 0.151463  | -1.638800 |
| 8                | 1                | 0              | 0.633281                | -0.963389 | -1.475390 |
| 9                | 1                | 0              | -0.110809               | -2.430932 | 0.268083  |
| 10               | 1                | 0              | 0.189618                | -1.244744 | 1.522567  |
| 11               | 1                | 0              | -2.290314               | -1.519099 | -0.081826 |
| 12               | 1                | 0              | -2.002468               | -0.486251 | 1.302272  |
| 13               | 6                | 0              | 2.182955                | -0.541795 | -0.111710 |
| 14               | 1                | 0              | 2.947678                | -0.417569 | -0.870196 |
| 15               | 1                | 0              | 2.503374                | -0.543466 | 0.924993  |
| 16               | 6                | 0              | 0.323993                | 1.745093  | 0.689138  |
| 17               | 1                | 0              | 1.391322                | 1.973129  | 0.765448  |
| 18               | 1                | 0              | -0.219251               | 2.692621  | 0.608984  |
| 19               | 1                | 0              | 0.018641                | 1.272063  | 1.629059  |
| 20               | 1                | 0              | 0.343257                | 1.389049  | -1.427524 |

**9TS**

E(UHF) = -272.67274291 H

1 imaginary frequency

| Center<br>Number | Atomic<br>Number | Atomic<br>Type | Coordinates (Angstroms) |           |           |
|------------------|------------------|----------------|-------------------------|-----------|-----------|
|                  |                  |                | X                       | Y         | Z         |
| 1                | 6                | 0              | 1.135294                | -1.141990 | 0.286167  |
| 2                | 6                | 0              | 1.074112                | 0.332245  | 0.590416  |
| 3                | 6                | 0              | -1.154081               | 0.443541  | 0.524320  |
| 4                | 6                | 0              | -1.328151               | -0.991159 | 0.037315  |
| 5                | 6                | 0              | -0.045553               | -1.520725 | -0.621659 |
| 6                | 1                | 0              | 2.087482                | -1.409243 | -0.196664 |
| 7                | 1                | 0              | 1.077146                | -1.723541 | 1.214111  |
| 8                | 1                | 0              | -1.130525               | 0.580776  | 1.602401  |
| 9                | 1                | 0              | -1.585327               | -1.631830 | 0.889603  |
| 10               | 1                | 0              | -2.167983               | -1.049600 | -0.663017 |
| 11               | 1                | 0              | -0.095652               | -2.601666 | -0.794609 |
| 12               | 1                | 0              | 0.081382                | -1.046799 | -1.602961 |
| 13               | 6                | 0              | -1.557966               | 1.515116  | -0.229945 |
| 14               | 1                | 0              | -1.577872               | 2.521653  | 0.173067  |
| 15               | 1                | 0              | -1.790620               | 1.409838  | -1.285720 |
| 16               | 6                | 0              | 1.629556                | 1.303753  | -0.409769 |
| 17               | 1                | 0              | 1.288555                | 2.324605  | -0.212529 |
| 18               | 1                | 0              | 2.730278                | 1.313527  | -0.380626 |
| 19               | 1                | 0              | 1.335730                | 1.050512  | -1.433690 |
| 20               | 1                | 0              | 1.228132                | 0.617080  | 1.629567  |

**10e**

E(UHF) = -311.75197739 AU

| Center<br>Number | Atomic<br>Number | Atomic<br>Type | Coordinates (Angstroms) |           |           |
|------------------|------------------|----------------|-------------------------|-----------|-----------|
|                  |                  |                | X                       | Y         | Z         |
| 1                | 6                | 0              | -3.912474               | 0.485713  | -0.376020 |
| 2                | 1                | 0              | -3.970373               | 1.348327  | 0.282540  |
| 3                | 1                | 0              | -4.726938               | 0.362081  | -1.082100 |
| 4                | 6                | 0              | -2.899510               | -0.373168 | -0.313671 |
| 5                | 1                | 0              | -2.884263               | -1.223305 | -0.996502 |
| 6                | 6                | 0              | -1.727429               | -0.274234 | 0.619243  |
| 7                | 1                | 0              | -1.865649               | 0.575072  | 1.299691  |
| 8                | 1                | 0              | -1.683057               | -1.175180 | 1.249017  |
| 9                | 6                | 0              | -0.385288               | -0.132229 | -0.121082 |
| 10               | 1                | 0              | -0.404052               | 0.779064  | -0.730771 |
| 11               | 1                | 0              | -0.263622               | -0.969310 | -0.820690 |
| 12               | 6                | 0              | 0.827959                | -0.089585 | 0.842467  |
| 13               | 1                | 0              | 0.816306                | -1.010986 | 1.442263  |
| 14               | 1                | 0              | 0.676222                | 0.743085  | 1.543803  |
| 15               | 6                | 0              | 2.152365                | 0.056651  | 0.158255  |
| 16               | 6                | 0              | 2.627965                | 1.413233  | -0.255841 |
| 17               | 1                | 0              | 3.723744                | 1.465836  | -0.282539 |
| 18               | 1                | 0              | 2.286960                | 1.690895  | -1.269440 |
| 19               | 1                | 0              | 2.266101                | 2.195679  | 0.420512  |
| 20               | 6                | 0              | 2.819615                | -1.146312 | -0.429933 |
| 21               | 1                | 0              | 2.517438                | -1.329466 | -1.476810 |
| 22               | 1                | 0              | 3.911065                | -1.033774 | -0.447894 |
| 23               | 1                | 0              | 2.580904                | -2.058427 | 0.128413  |

**10TS**

E(UHF) = -311.72522233 AU

1 imaginary frequency

| Center<br>Number | Atomic<br>Number | Atomic<br>Type | Coordinates (Angstroms) |           |           |
|------------------|------------------|----------------|-------------------------|-----------|-----------|
|                  |                  |                | X                       | Y         | Z         |
| 1                | 6                | 0              | -0.387958               | -1.512943 | -0.017522 |
| 2                | 6                | 0              | -0.970146               | -0.117675 | 0.006456  |
| 3                | 6                | 0              | 0.929316                | 0.860540  | -0.562751 |
| 4                | 6                | 0              | 1.785203                | -0.395576 | -0.425796 |
| 5                | 6                | 0              | 1.080503                | -1.466362 | 0.422960  |
| 6                | 1                | 0              | -0.963774               | -2.191888 | 0.630397  |
| 7                | 1                | 0              | -0.446622               | -1.924617 | -1.033158 |
| 8                | 1                | 0              | 0.501820                | 1.034121  | -1.547381 |
| 9                | 1                | 0              | 1.984804                | -0.802856 | -1.424390 |
| 10               | 1                | 0              | 2.758334                | -0.143662 | 0.008427  |
| 11               | 1                | 0              | 1.565247                | -2.443957 | 0.323963  |
| 12               | 1                | 0              | 1.140467                | -1.191066 | 1.482959  |
| 13               | 6                | 0              | 1.157835                | 1.972683  | 0.212244  |
| 14               | 1                | 0              | 0.670389                | 2.919888  | 0.008456  |
| 15               | 1                | 0              | 1.760385                | 1.920671  | 1.114543  |
| 16               | 6                | 0              | -1.931254               | 0.246644  | -1.094195 |
| 17               | 1                | 0              | -2.909840               | -0.237628 | -0.942362 |
| 18               | 1                | 0              | -2.116422               | 1.326301  | -1.127630 |
| 19               | 1                | 0              | -1.568050               | -0.069104 | -2.078111 |
| 20               | 6                | 0              | -1.337250               | 0.427838  | 1.362089  |
| 21               | 1                | 0              | -1.446648               | 1.516647  | 1.339152  |
| 22               | 1                | 0              | -2.297901               | 0.008197  | 1.701065  |
| 23               | 1                | 0              | -0.589681               | 0.188060  | 2.123153  |

**10c**

E(UHF) = -311.76184929 AU

| Center<br>Number | Atomic<br>Number | Atomic<br>Type | Coordinates (Angstroms) |   |   |
|------------------|------------------|----------------|-------------------------|---|---|
|                  |                  |                | X                       | Y | Z |

|    |   |   |           |           |           |
|----|---|---|-----------|-----------|-----------|
| 1  | 6 | 0 | 0.622165  | -1.402861 | -0.349975 |
| 2  | 6 | 0 | -0.547993 | -0.457559 | 0.000717  |
| 3  | 6 | 0 | 0.039213  | 0.928051  | -0.477907 |
| 4  | 6 | 0 | 1.520573  | 0.876096  | -0.028158 |
| 5  | 6 | 0 | 1.915874  | -0.626301 | -0.009071 |
| 6  | 1 | 0 | 0.551933  | -2.361602 | 0.174529  |
| 7  | 1 | 0 | 0.590429  | -1.625386 | -1.423410 |
| 8  | 1 | 0 | 0.013297  | 0.879218  | -1.576409 |
| 9  | 1 | 0 | 2.153602  | 1.470572  | -0.692532 |
| 10 | 1 | 0 | 1.621558  | 1.317876  | 0.969063  |
| 11 | 1 | 0 | 2.713350  | -0.849860 | -0.723006 |
| 12 | 1 | 0 | 2.296131  | -0.911933 | 0.976174  |
| 13 | 6 | 0 | -0.693354 | 2.143878  | -0.047286 |
| 14 | 1 | 0 | -1.506013 | 2.554001  | -0.635676 |
| 15 | 1 | 0 | -0.498420 | 2.596569  | 0.919388  |
| 16 | 6 | 0 | -1.833163 | -0.816821 | -0.749940 |
| 17 | 1 | 0 | -2.192869 | -1.811469 | -0.462694 |
| 18 | 1 | 0 | -2.633206 | -0.101064 | -0.531410 |
| 19 | 1 | 0 | -1.671576 | -0.821106 | -1.833844 |
| 20 | 6 | 0 | -0.817239 | -0.464527 | 1.515630  |
| 21 | 1 | 0 | -1.593074 | 0.260157  | 1.781517  |
| 22 | 1 | 0 | -1.158456 | -1.455064 | 1.836276  |
| 23 | 1 | 0 | 0.076862  | -0.220645 | 2.097969  |

**11e**

E(UHF) = -269.47431083

| Center<br>Number | Atomic<br>Number | Atomic<br>Type | Coordinates (Angstroms) |           |           |
|------------------|------------------|----------------|-------------------------|-----------|-----------|
|                  |                  |                | X                       | Y         | Z         |
| 1                | 6                | 0              | -2.948552               | -0.110383 | -0.360742 |
| 2                | 1                | 0              | -3.054576               | 0.741820  | -1.026354 |
| 3                | 1                | 0              | -3.813804               | -0.757003 | -0.261487 |
| 4                | 6                | 0              | -1.820801               | -0.342170 | 0.300786  |
| 5                | 1                | 0              | -1.730538               | -1.206942 | 0.954947  |
| 6                | 6                | 0              | -0.606710               | 0.533199  | 0.243685  |
| 7                | 1                | 0              | -0.725236               | 1.309854  | -0.530254 |
| 8                | 1                | 0              | -0.474604               | 1.058547  | 1.208314  |
| 9                | 6                | 0              | 1.736070                | 0.453795  | 0.011354  |
| 10               | 1                | 0              | 1.830892                | 0.988586  | 0.982397  |
| 11               | 1                | 0              | 1.730747                | 1.251259  | -0.757575 |
| 12               | 6                | 0              | 2.876130                | -0.468010 | -0.198724 |
| 13               | 1                | 0              | 2.743935                | -1.529823 | -0.036823 |
| 14               | 1                | 0              | 3.866164                | -0.074604 | -0.391043 |
| 15               | 8                | 0              | 0.526276                | -0.272535 | -0.015035 |

**11TS**

E(UHF) = -269.45693490

1 Imaginary frequency

| Center<br>Number | Atomic<br>Number | Atomic<br>Type | Coordinates (Angstroms) |           |           |
|------------------|------------------|----------------|-------------------------|-----------|-----------|
|                  |                  |                | X                       | Y         | Z         |
| 1                | 6                | 0              | -0.150392               | -1.183852 | 0.044848  |
| 2                | 6                | 0              | -1.081750               | -0.089090 | -0.425878 |
| 3                | 6                | 0              | 0.605119                | 1.428565  | -0.161451 |
| 4                | 6                | 0              | 1.534363                | 0.374739  | 0.348097  |
| 5                | 1                | 0              | -0.321042               | -1.366114 | 1.120144  |
| 6                | 1                | 0              | -0.360287               | -2.116267 | -0.491255 |
| 7                | 1                | 0              | -1.053373               | 0.116147  | -1.493160 |
| 8                | 1                | 0              | 0.697471                | 1.734039  | -1.199294 |
| 9                | 1                | 0              | 0.222704                | 2.180476  | 0.519512  |
| 10               | 1                | 0              | 2.577277                | 0.558597  | 0.058882  |
| 11               | 1                | 0              | 1.494344                | 0.329273  | 1.448784  |
| 12               | 6                | 0              | -2.186922               | 0.275971  | 0.280320  |
| 13               | 1                | 0              | -2.946706               | 0.924631  | -0.140545 |

|    |   |   |           |           |           |
|----|---|---|-----------|-----------|-----------|
| 14 | 1 | 0 | -2.316102 | -0.020027 | 1.317239  |
| 15 | 8 | 0 | 1.210400  | -0.897344 | -0.206991 |

---

**11c**

E(UHF) = -269.49802155

| Center<br>Number | Atomic<br>Number | Atomic<br>Type | Coordinates (Angstroms) |           |           |
|------------------|------------------|----------------|-------------------------|-----------|-----------|
|                  |                  |                | X                       | Y         | Z         |
| 1                | 6                | 0              | 0.027611                | -1.167815 | 0.147701  |
| 2                | 6                | 0              | -0.807832               | 0.024397  | -0.378108 |
| 3                | 6                | 0              | 0.085654                | 1.193261  | 0.113291  |
| 4                | 6                | 0              | 1.508722                | 0.618352  | -0.000720 |
| 5                | 1                | 0              | -0.195203               | -1.340233 | 1.214125  |
| 6                | 1                | 0              | -0.160587               | -2.097993 | -0.396298 |
| 7                | 1                | 0              | -0.775448               | -0.006235 | -1.473390 |
| 8                | 1                | 0              | -0.053811               | 2.105828  | -0.470452 |
| 9                | 1                | 0              | -0.160085               | 1.424148  | 1.155525  |
| 10               | 1                | 0              | 2.011934                | 0.945077  | -0.919653 |
| 11               | 1                | 0              | 2.139289                | 0.911957  | 0.848716  |
| 12               | 6                | 0              | -2.213334               | 0.062431  | 0.090469  |
| 13               | 1                | 0              | -3.048631               | -0.031045 | -0.591496 |
| 14               | 1                | 0              | -2.430780               | 0.149244  | 1.150512  |
| 15               | 8                | 0              | 1.383548                | -0.805562 | -0.044173 |

---

**12e**

E(UHF) = -307.38068128

| Number | Number | Type | X         | Y         | Z         |
|--------|--------|------|-----------|-----------|-----------|
| 1      | 6      | 0    | -3.512475 | -0.145944 | -0.417811 |
| 2      | 1      | 0    | -3.542380 | 0.590049  | -1.216784 |
| 3      | 1      | 0    | -4.392272 | -0.769989 | -0.302485 |
| 4      | 6      | 0    | -2.455381 | -0.268644 | 0.378271  |
| 5      | 1      | 0    | -2.467978 | -1.021072 | 1.166998  |
| 6      | 6      | 0    | -1.198353 | 0.548458  | 0.283707  |
| 7      | 1      | 0    | -1.305815 | 1.304462  | -0.504037 |
| 8      | 1      | 0    | -1.046602 | 1.097009  | 1.224865  |
| 9      | 6      | 0    | 0.047135  | -0.312269 | 0.010897  |
| 10     | 1      | 0    | -0.071750 | -0.845569 | -0.938393 |
| 11     | 1      | 0    | 0.137905  | -1.081971 | 0.787285  |
| 12     | 6      | 0    | 1.333793  | 0.519721  | -0.032201 |
| 13     | 1      | 0    | 1.512877  | 1.054601  | 0.910336  |
| 14     | 1      | 0    | 1.268639  | 1.270333  | -0.831747 |
| 15     | 6      | 0    | 2.561736  | -0.318240 | -0.365547 |
| 16     | 8      | 0    | 3.656081  | -0.217043 | 0.070008  |

---

**12TS**

E(UHF) = -307.35907133

1 Imaginary frequency

| Center<br>Number | Atomic<br>Number | Atomic<br>Type | Coordinates (Angstroms) |           |           |
|------------------|------------------|----------------|-------------------------|-----------|-----------|
|                  |                  |                | X                       | Y         | Z         |
| 1                | 6                | 0              | 1.442111                | 0.549043  | 0.368086  |
| 2                | 6                | 0              | -1.222193               | -0.153215 | -0.419763 |
| 3                | 6                | 0              | -0.925031               | 1.258219  | 0.048181  |
| 4                | 6                | 0              | 0.543818                | 1.655906  | -0.183421 |

|    |   |   |           |           |           |
|----|---|---|-----------|-----------|-----------|
| 5  | 1 | 0 | 1.411138  | 0.521221  | 1.466208  |
| 6  | 1 | 0 | 2.492500  | 0.635165  | 0.070538  |
| 7  | 1 | 0 | -1.134908 | -0.318395 | -1.492816 |
| 8  | 1 | 0 | -1.582388 | 1.965975  | -0.471350 |
| 9  | 1 | 0 | -1.163573 | 1.336301  | 1.116442  |
| 10 | 1 | 0 | 0.730624  | 1.769297  | -1.258378 |
| 11 | 1 | 0 | 0.766523  | 2.619911  | 0.282781  |
| 12 | 6 | 0 | -2.012769 | -1.009953 | 0.295278  |
| 13 | 1 | 0 | -2.355847 | -1.949308 | -0.122108 |
| 14 | 1 | 0 | -2.242212 | -0.824543 | 1.340160  |
| 15 | 6 | 0 | 0.886819  | -0.775849 | -0.121685 |
| 16 | 8 | 0 | 1.350202  | -1.862566 | -0.106441 |

**12c**

E(UHF) = -307.39996881

| Center<br>Number | Atomic<br>Number | Atomic<br>Type | Coordinates (Angstroms) |           |           |
|------------------|------------------|----------------|-------------------------|-----------|-----------|
|                  |                  |                | X                       | Y         | Z         |
| 1                | 6                | 0              | -1.221000               | 0.947817  | 0.300096  |
| 2                | 6                | 0              | 0.639030                | -0.599745 | -0.365424 |
| 3                | 6                | 0              | -0.616339               | -1.386026 | 0.054211  |
| 4                | 6                | 0              | -1.788634               | -0.404627 | -0.151127 |
| 5                | 1                | 0              | -1.292145               | 1.058627  | 1.390808  |
| 6                | 1                | 0              | -1.688627               | 1.830166  | -0.142713 |
| 7                | 1                | 0              | 0.712832                | -0.598542 | -1.466908 |
| 8                | 1                | 0              | -0.737103               | -2.316048 | -0.506216 |
| 9                | 1                | 0              | -0.536402               | -1.653890 | 1.115579  |
| 10               | 1                | 0              | -2.057902               | -0.361923 | -1.213078 |
| 11               | 1                | 0              | -2.685806               | -0.698810 | 0.398595  |
| 12               | 6                | 0              | 1.925442                | -1.041891 | 0.218725  |
| 13               | 1                | 0              | 2.861291                | -0.649496 | -0.159209 |
| 14               | 1                | 0              | 1.940147                | -1.581587 | 1.159109  |
| 15               | 6                | 0              | 0.269973                | 0.888984  | -0.044078 |
| 16               | 8                | 0              | 1.029110                | 1.818054  | -0.081298 |

**13e**

E(UHF) = -379.06498923

| Center<br>Number | Atomic<br>Number | Atomic<br>Type | Coordinates (Angstroms) |           |           |
|------------------|------------------|----------------|-------------------------|-----------|-----------|
|                  |                  |                | X                       | Y         | Z         |
| 1                | 6                | 0              | 3.178923                | 0.019459  | -0.279261 |
| 2                | 1                | 0              | 3.244186                | 0.925982  | -0.874074 |
| 3                | 1                | 0              | 4.092237                | -0.554503 | -0.168857 |
| 4                | 6                | 0              | 2.042391                | -0.361681 | 0.291723  |
| 5                | 1                | 0              | 1.992773                | -1.274882 | 0.879906  |
| 6                | 6                | 0              | 0.774327                | 0.423117  | 0.214007  |
| 7                | 1                | 0              | 0.457313                | 0.782051  | 1.199018  |
| 8                | 1                | 0              | 0.868239                | 1.282732  | -0.455266 |
| 9                | 6                | 0              | -1.504769               | -0.035311 | -0.187498 |
| 10               | 8                | 0              | -1.847643               | 1.058130  | 0.302356  |
| 11               | 8                | 0              | -2.453465               | -0.755745 | -0.596119 |
| 12               | 8                | 0              | -0.263278               | -0.465017 | -0.299458 |

**13TS**

E(UHF) = -379.07066236

I imaginary frequency

| Center<br>Number | Atomic<br>Number | Atomic<br>Type | Coordinates (Angstroms) |           |           |
|------------------|------------------|----------------|-------------------------|-----------|-----------|
|                  |                  |                | X                       | Y         | Z         |
| 1                | 6                | 0              | -0.651705               | 1.191625  | -0.131945 |
| 2                | 6                | 0              | -1.379728               | 0.011150  | 0.451196  |
| 3                | 1                | 0              | -0.877623               | 1.287382  | -1.200725 |
| 4                | 1                | 0              | -0.946911               | 2.118414  | 0.369996  |
| 5                | 1                | 0              | -1.207730               | -0.185981 | 1.505014  |
| 6                | 6                | 0              | -2.407462               | -0.607234 | -0.185663 |
| 7                | 1                | 0              | -2.989217               | -1.382131 | 0.299295  |
| 8                | 1                | 0              | -2.649448               | -0.379208 | -1.218810 |
| 9                | 8                | 0              | 0.328949                | -1.131452 | -0.070549 |
| 10               | 8                | 0              | 0.759450                | 1.083081  | 0.051734  |
| 11               | 6                | 0              | 1.222955                | -0.187776 | -0.023259 |
| 12               | 8                | 0              | 2.407422                | -0.439762 | -0.033278 |

**13c**

$$E(\text{UHF}) = -379.11296835$$

| Center<br>Number | Atomic<br>Number | Atomic<br>Type | Coordinates (Angstroms) |           |           |
|------------------|------------------|----------------|-------------------------|-----------|-----------|
|                  |                  |                | X                       | Y         | Z         |
| 1                | 6                | 0              | -0.569199               | 1.262146  | -0.058587 |
| 2                | 6                | 0              | -1.091536               | -0.119218 | 0.407632  |
| 3                | 1                | 0              | -0.883886               | 1.488425  | -1.083234 |
| 4                | 1                | 0              | -0.866759               | 2.075989  | 0.604087  |
| 5                | 1                | 0              | -1.231325               | -0.123596 | 1.494716  |
| 6                | 6                | 0              | -2.303359               | -0.603166 | -0.283881 |
| 7                | 1                | 0              | -3.239150               | -0.724997 | 0.244334  |
| 8                | 1                | 0              | -2.254235               | -0.844617 | -1.339269 |
| 9                | 8                | 0              | 0.049386                | -0.963893 | 0.112573  |
| 10               | 8                | 0              | 0.848728                | 1.115857  | -0.018451 |
| 11               | 6                | 0              | 1.167776                | -0.206918 | -0.026142 |
| 12               | 8                | 0              | 2.270302                | -0.635942 | -0.137038 |

**14e**

$$E(\text{UHF}) = -269.49205403$$

| Center<br>Number | Atomic<br>Number | Atomic<br>Type | Coordinates (Angstroms) |           |           |
|------------------|------------------|----------------|-------------------------|-----------|-----------|
|                  |                  |                | X                       | Y         | Z         |
| 1                | 6                | 0              | -2.990382               | -0.022802 | -0.434068 |
| 2                | 1                | 0              | -2.983294               | 0.777243  | -1.169500 |
| 3                | 1                | 0              | -3.897721               | -0.614214 | -0.372840 |
| 4                | 6                | 0              | -1.944010               | -0.259182 | 0.350508  |
| 5                | 1                | 0              | -1.994647               | -1.073874 | 1.073079  |
| 6                | 6                | 0              | -0.649566               | 0.502061  | 0.326073  |
| 7                | 1                | 0              | -0.719361               | 1.323041  | -0.398571 |
| 8                | 1                | 0              | -0.482271               | 0.968027  | 1.309137  |
| 9                | 6                | 0              | 0.559033                | -0.389316 | -0.006037 |
| 10               | 1                | 0              | 0.421102                | -0.848571 | -0.991516 |
| 11               | 1                | 0              | 0.637778                | -1.210677 | 0.715892  |
| 12               | 6                | 0              | 1.879550                | 0.389030  | -0.003600 |
| 13               | 1                | 0              | 2.042014                | 0.865512  | 0.990024  |
| 14               | 1                | 0              | 1.845579                | 1.256734  | -0.693945 |
| 15               | 8                | 0              | 3.000552                | -0.349292 | -0.230309 |

**14TS**

$$E(\text{UHF}) = -269.46626960$$

## 1 Imaginary frequency

| Center<br>Number | Atomic<br>Number | Atomic<br>Type | Coordinates (Angstroms) |           |           |
|------------------|------------------|----------------|-------------------------|-----------|-----------|
|                  |                  |                | X                       | Y         | Z         |
| 1                | 6                | 0              | 1.290174                | -0.754142 | 0.344716  |
| 2                | 6                | 0              | -1.026770               | 0.271145  | -0.442122 |
| 3                | 6                | 0              | -0.027854               | 1.271992  | 0.081384  |
| 4                | 6                | 0              | 1.395671                | 0.711584  | -0.088554 |
| 5                | 1                | 0              | 1.210280                | -0.828507 | 1.445664  |
| 6                | 1                | 0              | 2.195374                | -1.315875 | 0.053973  |
| 7                | 1                | 0              | -1.077059               | 0.156397  | -1.519888 |
| 8                | 1                | 0              | -0.138459               | 2.225023  | -0.449047 |
| 9                | 1                | 0              | -0.229192               | 1.465366  | 1.141364  |
| 10               | 1                | 0              | 1.689465                | 0.751497  | -1.143287 |
| 11               | 1                | 0              | 2.131073                | 1.280133  | 0.490895  |
| 12               | 6                | 0              | -2.068038               | -0.197531 | 0.313270  |
| 13               | 1                | 0              | -2.834524               | -0.835416 | -0.110977 |
| 14               | 1                | 0              | -2.110275               | -0.016903 | 1.382557  |
| 15               | 8                | 0              | 0.223028                | -1.337501 | -0.317927 |

## 14c

$$E(\text{UHF}) = -269.50054163$$

| Center<br>Number | Atomic<br>Number | Atomic<br>Type | Coordinates (Angstroms) |           |           |
|------------------|------------------|----------------|-------------------------|-----------|-----------|
|                  |                  |                | X                       | Y         | Z         |
| 1                | 6                | 0              | 1.308230                | -0.831179 | 0.172809  |
| 2                | 6                | 0              | -0.800817               | 0.052196  | -0.389660 |
| 3                | 6                | 0              | 0.067919                | 1.201105  | 0.184245  |
| 4                | 6                | 0              | 1.483576                | 0.673873  | -0.075624 |
| 5                | 1                | 0              | 1.516918                | -1.088297 | 1.221459  |
| 6                | 1                | 0              | 1.962502                | -1.444320 | -0.458205 |
| 7                | 1                | 0              | -0.872579               | 0.194141  | -1.483047 |
| 8                | 1                | 0              | -0.145448               | 2.159612  | -0.294074 |
| 9                | 1                | 0              | -0.120288               | 1.303636  | 1.258323  |
| 10               | 1                | 0              | 1.773717                | 0.860573  | -1.115120 |
| 11               | 1                | 0              | 2.242387                | 1.121734  | 0.570850  |
| 12               | 6                | 0              | -2.163103               | -0.067232 | 0.179730  |
| 13               | 1                | 0              | -2.991718               | 0.486051  | -0.244760 |
| 14               | 1                | 0              | -2.312845               | -0.633235 | 1.091141  |
| 15               | 8                | 0              | -0.053435               | -1.141559 | -0.121946 |



## References and Notes

1. Gaussian 09, Revision C 1, M. J. Frisch, G. W. Trucks, H. B. Schlegel, G. E. Scuseria, M. A. Robb, J. R. Cheeseman, G. Scalmani, V. Barone, B. Mennucci, G. A. Petersson, H. Nakatsuji, M. Caricato, X. Li, H. P. Hratchian, A. F. Izmaylov, J. Bloino, G. Zheng, J. L. Sonnenberg, M. Hada, M. Ehara, K. Toyota, R. Fukuda, J. Hasegawa, M. Ishida, T. Nakajima, Y. Honda, O. Kitao, H. Nakai, T. Vreven, J. A. Montgomery, Jr., J. E. Peralta, F. Ogliaro, M. Bearpark, J. J. Heyd, E. Brothers, K. N. Kudin, V. N. Staroverov, R. Kobayashi, J. Normand, K. Raghavachari, A. Rendell, J. C. Burant, S. S. Iyengar, J. Tomasi, M. Cossi, N. Rega, J. M. Millam, M. Klene, J. E. Knox, J. B. Cross, V. Bakken, C. Adamo, J. Jaramillo, R. Gomperts, R. E. Stratmann, O. Yazyev, A. J. Austin, R. Cammi, C. Pomelli, J. W. Ochterski, R. L. Martin, K. Morokuma, V. G. Zakrzewski, G. A. Voth, P. Salvador, J. J. Dannenberg, S. Dapprich, A. D. Daniels, O. Farkas, J. B. Foresman, J. V. Ortiz, J. Cioslowski, and D. J. Fox, Gaussian, Inc., Wallingford CT, 2009.
